# Supplementary material
Source: MDPI journal article supplement (https://www.mdpi.com/2071-1050/15/13/10494)

Supplementary materials

Figure S1: Graphical elaborations of the temperature results in the tests.

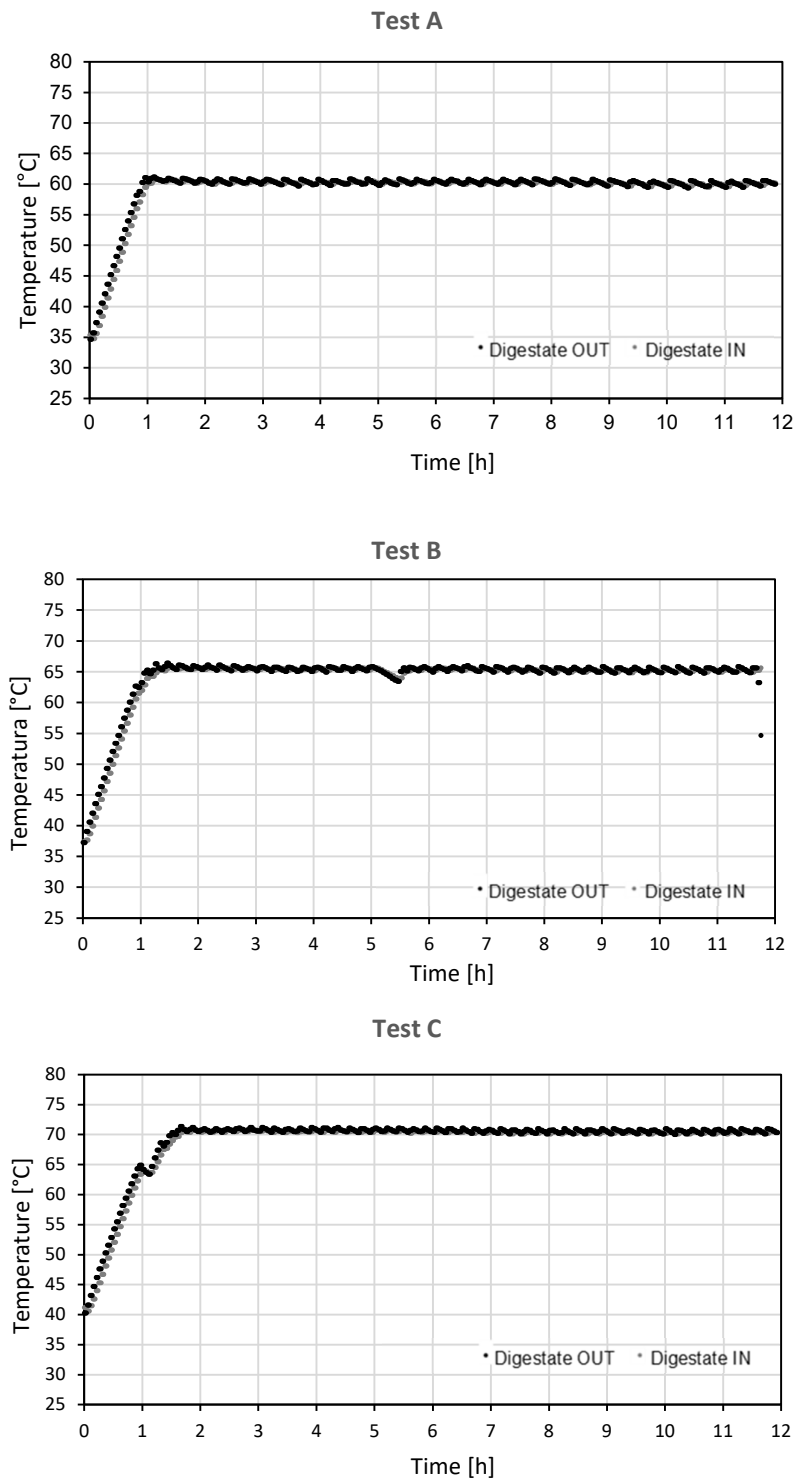

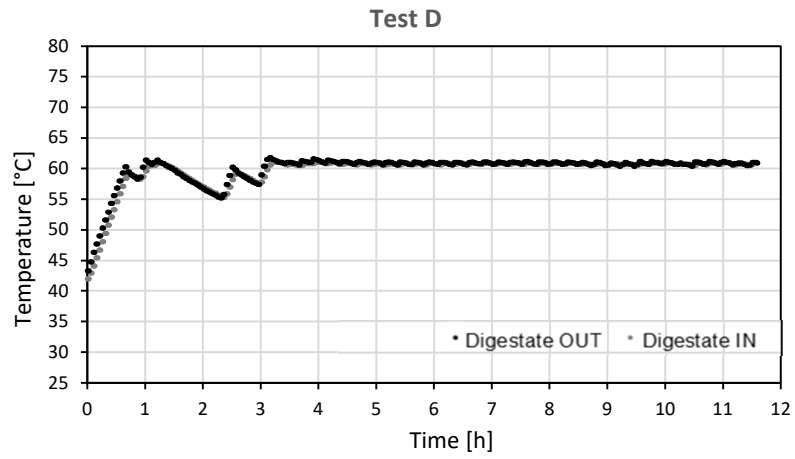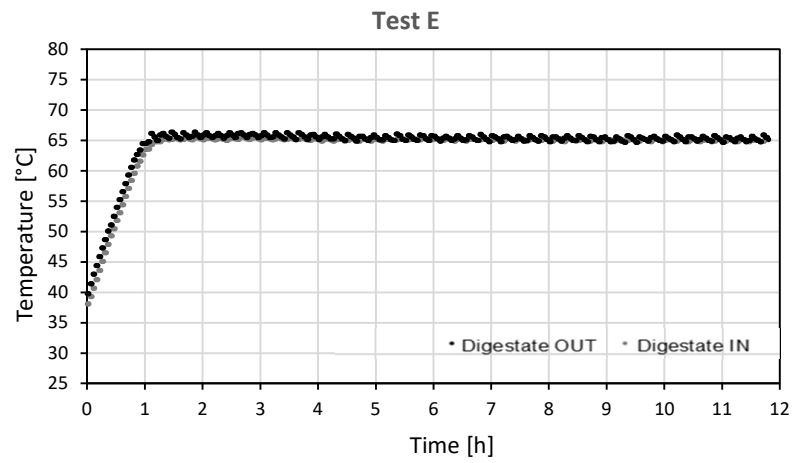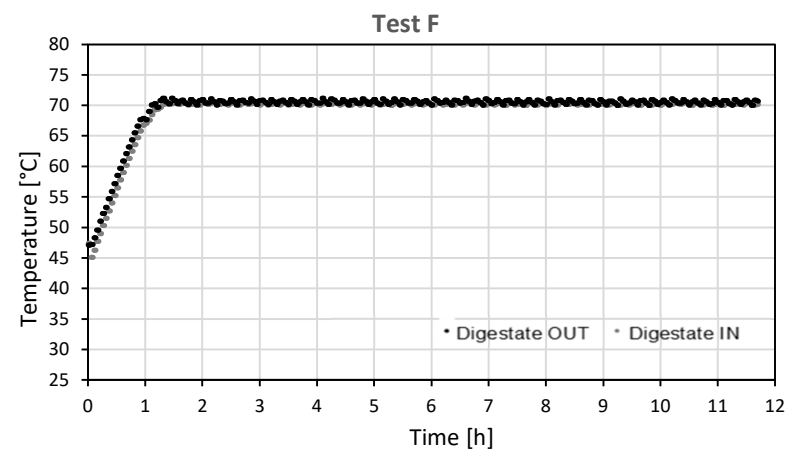

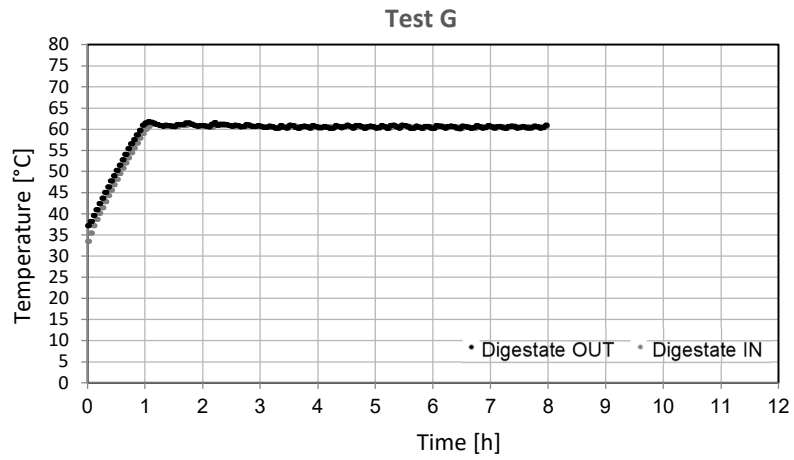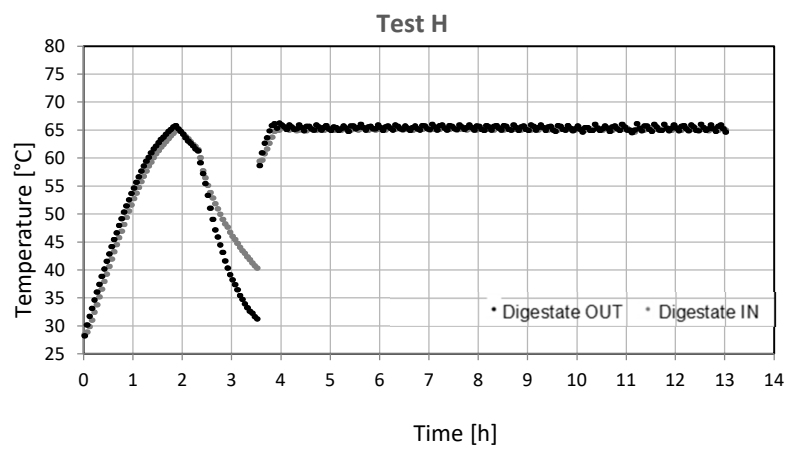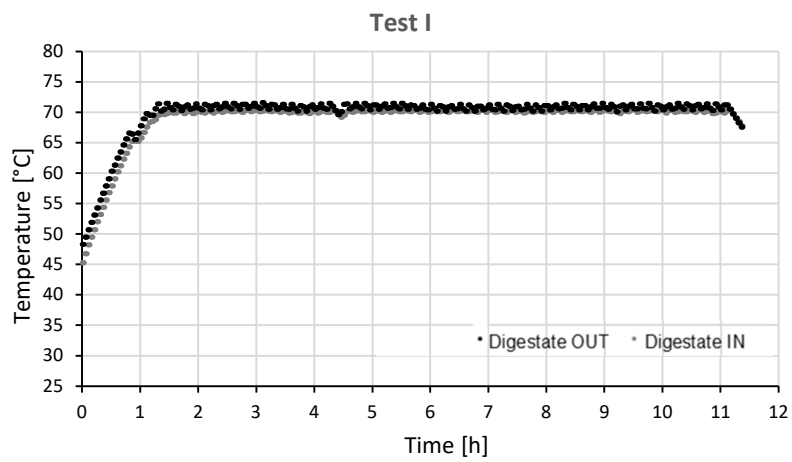

Supplement: s1 [file s1]
